# Supplementary material
Source: PubMed Central journal article supplement (PMC1568910)

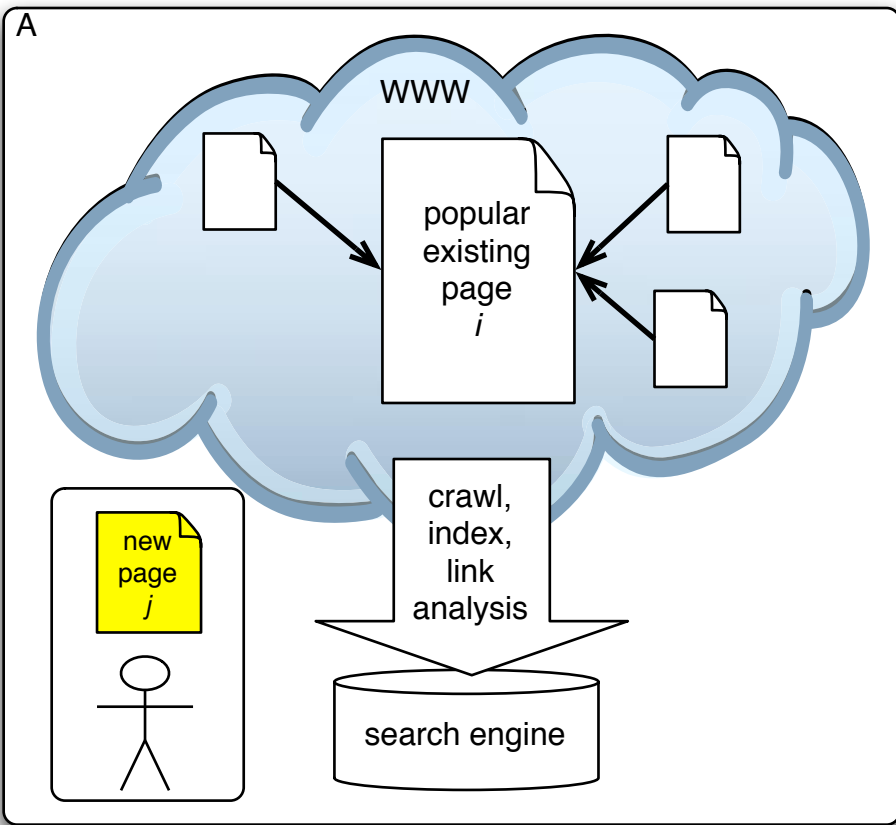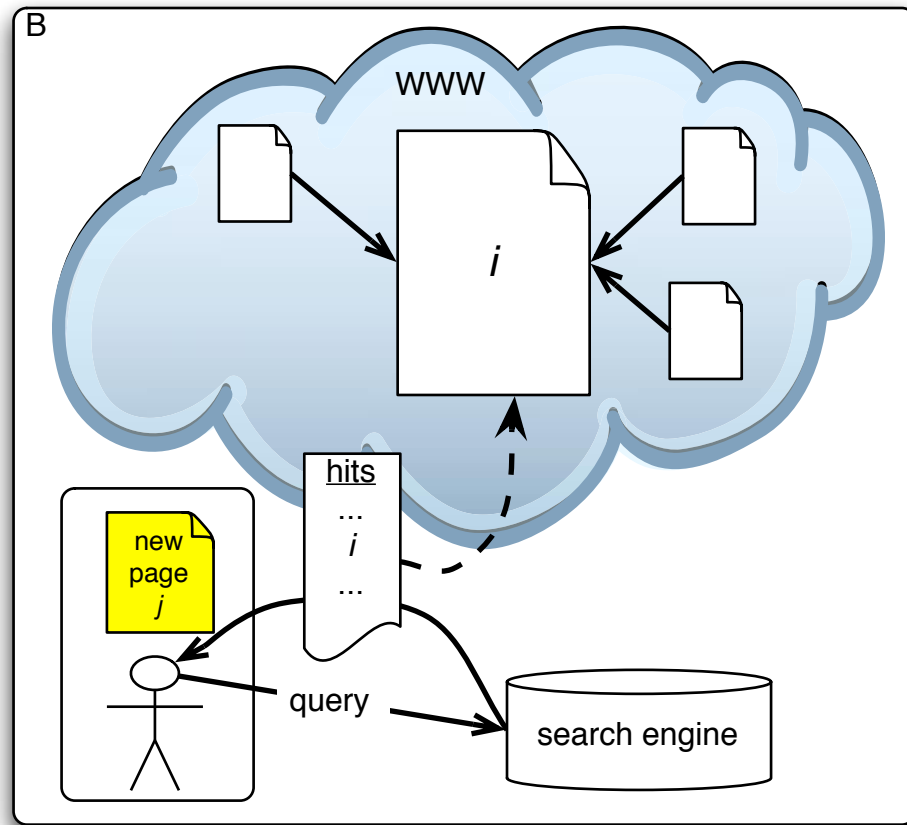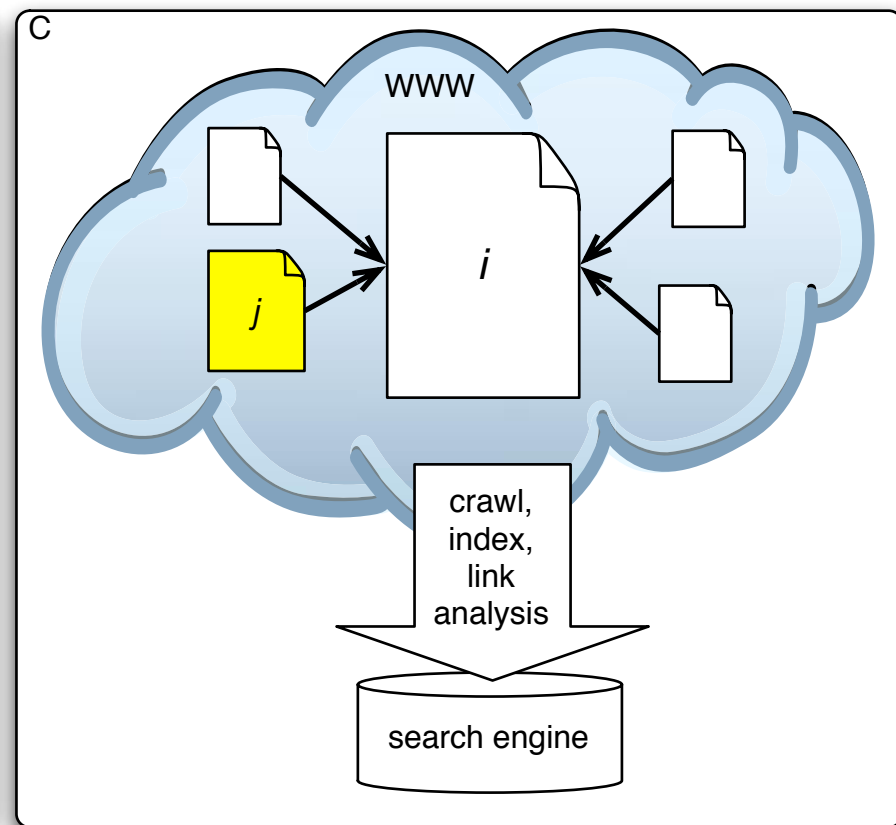

Supplement: pnas_0605525103_1.pdf [file pnas_0605525103_1.pdf]

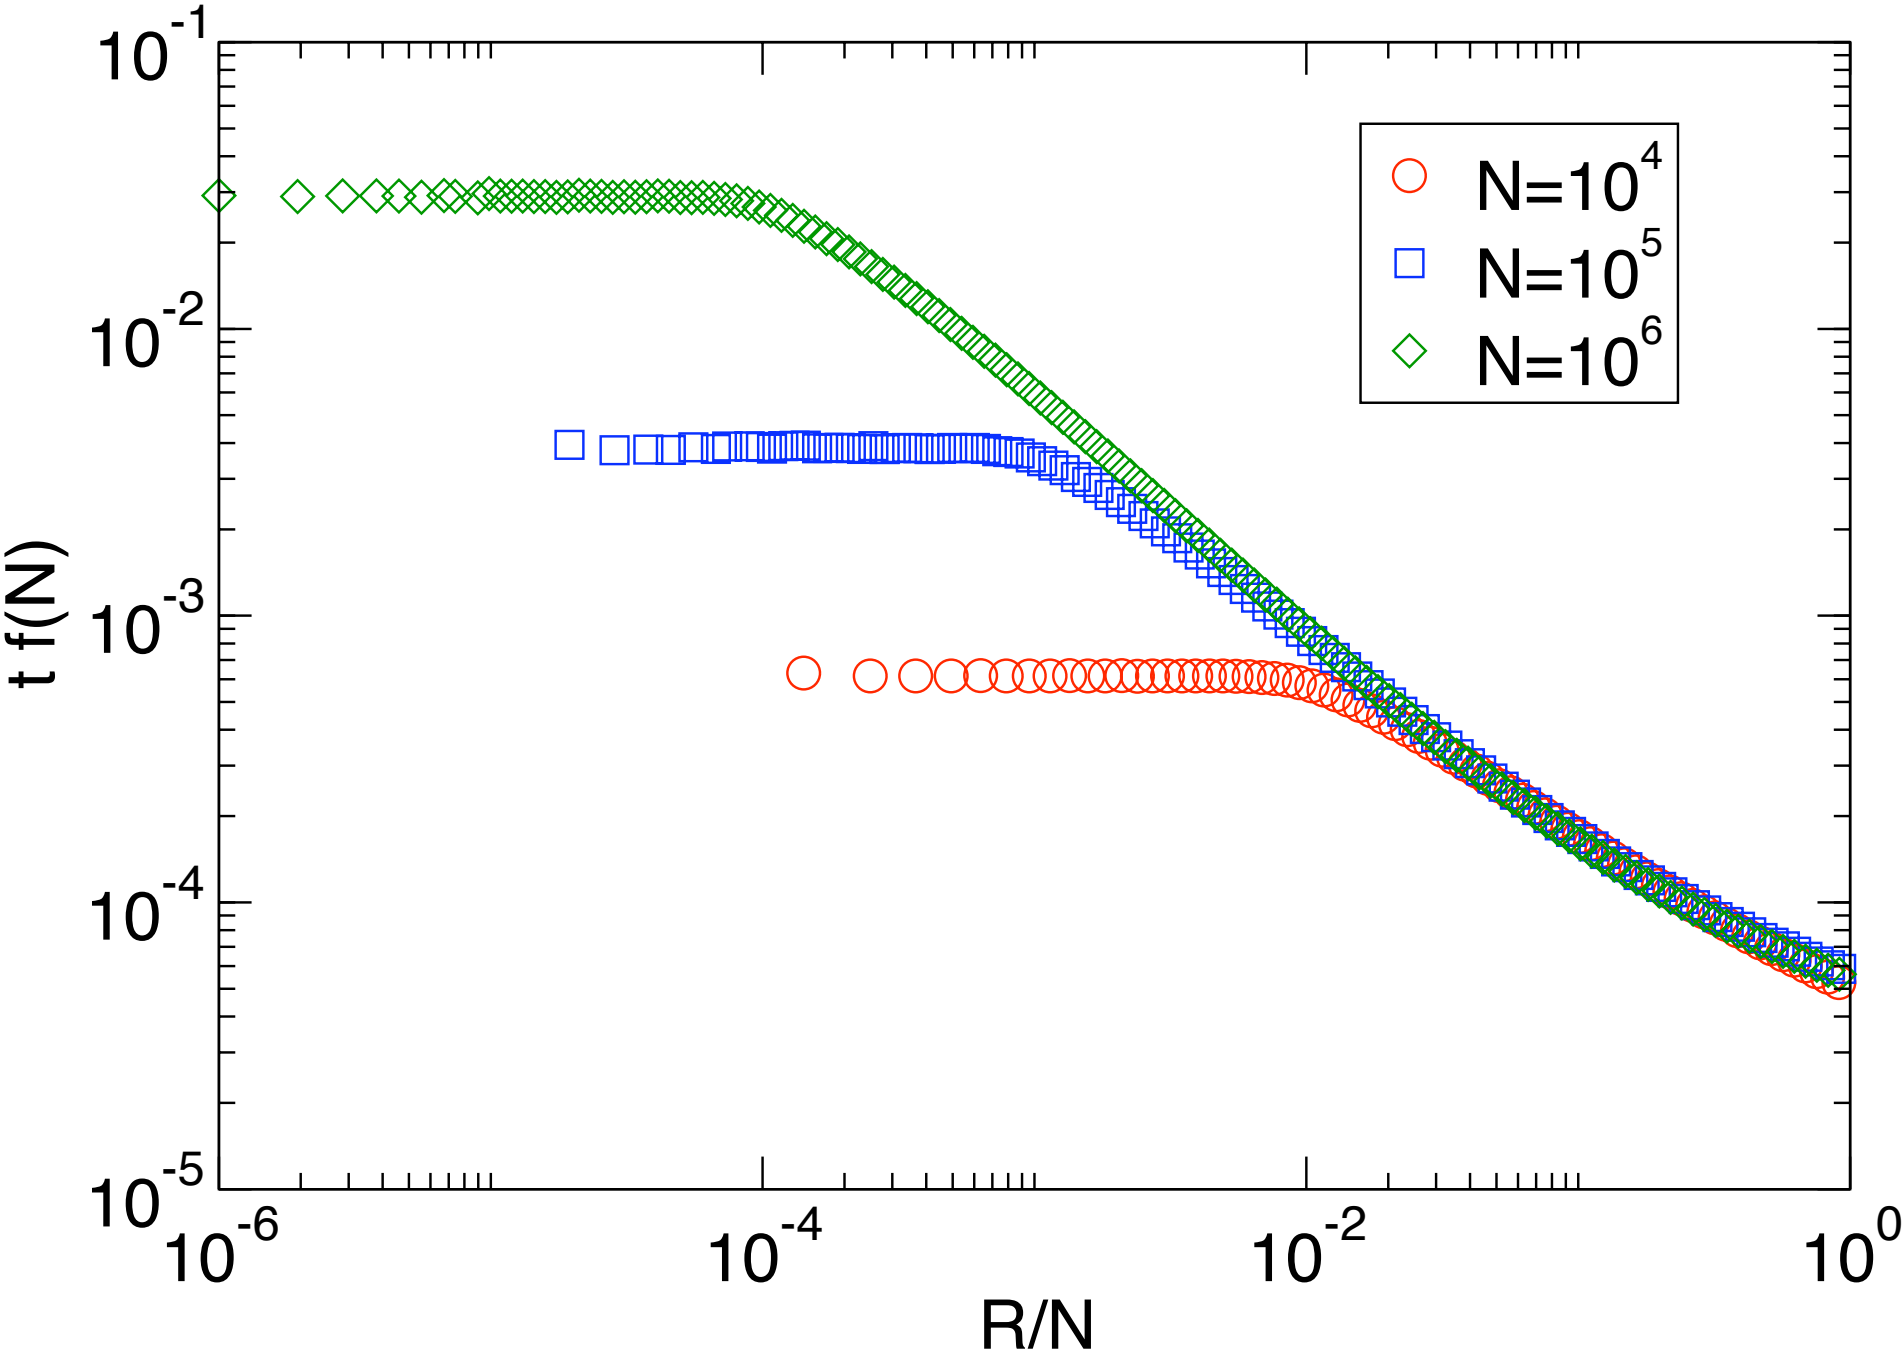

Supplement: pnas_0605525103_2.pdf [file pnas_0605525103_2.pdf]
